# Supplementary material
Source: publisher figshare collection journal article supplement (https://acs.figshare.com/ndownloader/files/5128291)
Supplement: Supplementary file 1 [file 5128291]

Supplemental Material for

# **Five New Zinc Phosphite Structures: Tertiary Building Blocks in the Construction of Hybrid Materials**

**Jian Fan, Carla Slebodnick, Diego Troya, Ross Angel, Brian E. Hanson\***

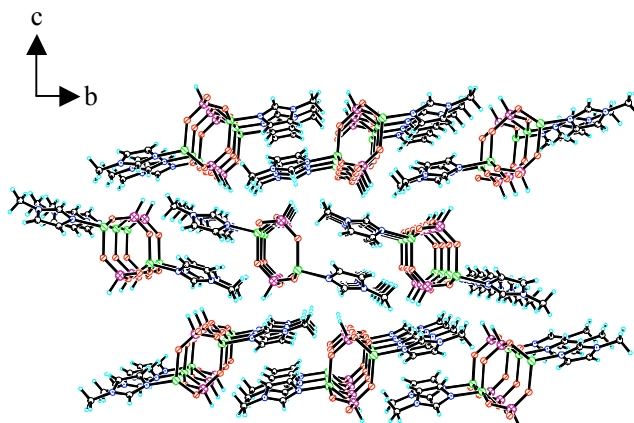

Figure S1. Cr

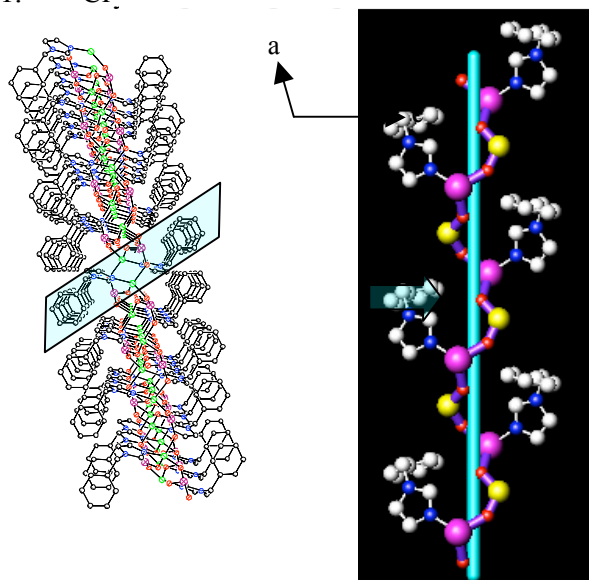

Figure S2. Side view of the 2D structure in **2** with the helical motif highlighted within blue square (left) and the helix (right, P: yellow, Zn: pink, O: red, N: blue and C: white).

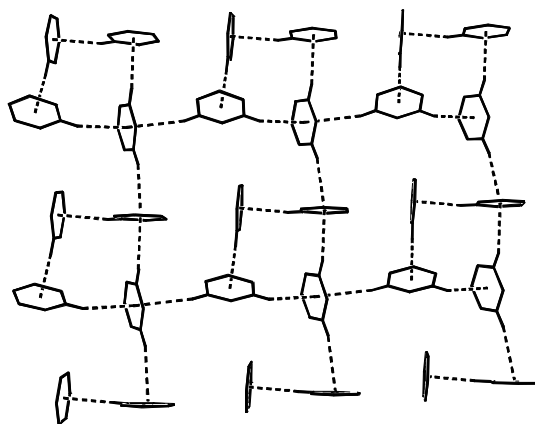

Figure S3. View of the arrangement of benzene rings in compound **2** along [001] direction with C-H $\cdots$  $\pi$  interaction indicated by dashed lines.

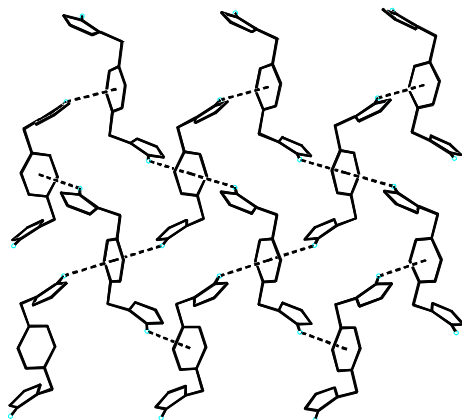

Figure S4. View of the arrangement of organic ligands in compound **3** with C-H $\cdots$  $\pi$  interaction indicated by dashed lines.

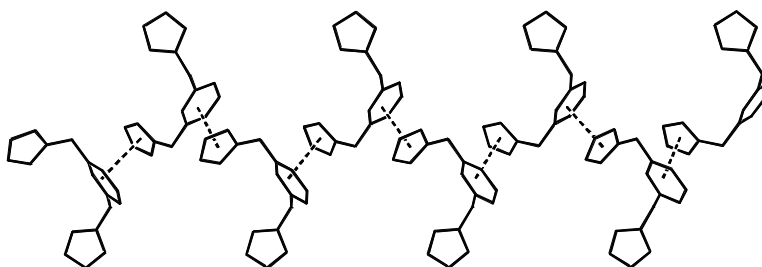

Figure S5. View of the arrangement of organic ligand in compound **4** along [001] direction with  $\pi\cdots\pi$  interaction indicated by dashed lines.

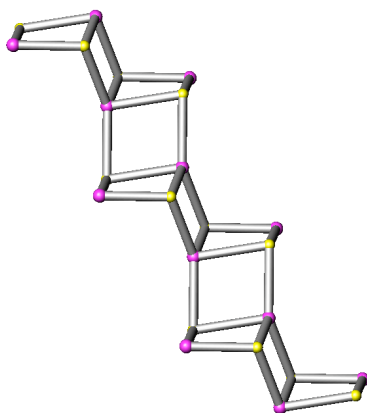

Figure S6. View of the 1D inorganic chain in **4** in a stair-step arrangement.

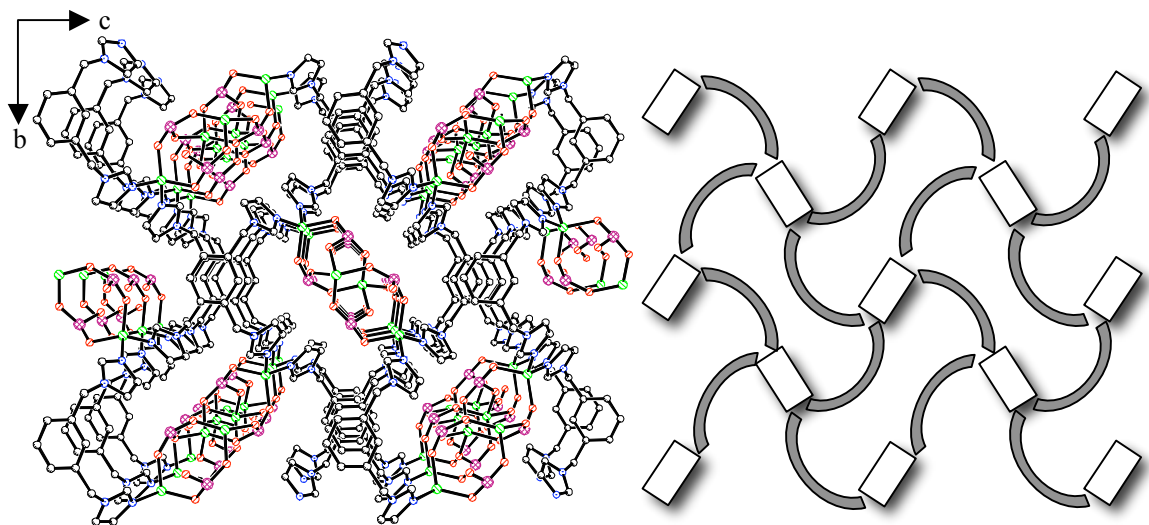

Figure S7. Crystal packing diagram for compound **4** in the *bc* plane with hydrogen atoms omitted for clarity (left) and a schematic rendering of the connection pattern between 1D inorganic chains (rectangle) and the organic ligand (curve) in the *bc* plane.
